# Supplementary material for: Delayed Femoral Artery Occlusion After Total Hip Arthroplasty via the Posterior Approach: A Single-Case Report From Thailand
Source: PubMed Central journal article supplement — Arthroplast Today. 2021 Aug 17;11:38–40. doi: 10.1016/j.artd.2021.04.015 (PMC8379353; doi:10.1016/j.artd.2021.04.015), 2021-08-17
Supplement: mmc1.pdf [file mmc1.pdf]

# CONFLICT OF INTEREST STATEMENT

## *American Association of Hip and Knee Surgeons*

(Adopted from the American Academy of Orthopaedic Surgeons disclosure statement)

The following form **must be filled out completely and submitted by each author (example, 6 authors, 6 forms).**  
**All items require a response. If there is no relevant disclosure for a given item, enter "None."**

---

Manuscript Title **Delayed femoral artery occlusion after total hip arthroplasty through the posterior approach: A case report**

1. Royalties from a company or supplier (The following conflicts were disclosed)  
- none
2. Speakers bureau/paid presentations for a company or supplier (The following conflicts were disclosed)  
-none
- 3A. Paid employee for a company or supplier (The following conflicts were disclosed)  
-none
- 3B. Paid consultant for a company or supplier (The following conflicts were disclosed)  
-none
- 3C. Unpaid consultants for a company or supplier (The following conflicts were disclosed)  
-none
4. Stock or stock options in a company or supplier (The following conflicts were disclosed)  
-none
5. Research support from a company or supplier as a Principal Investigator (The following conflicts were disclosed)  
-none
6. Other financial or material support from a company or supplier (The following conflicts were disclosed)  
-none
7. Royalties, financial or material support from publishers (The following conflicts were disclosed)  
-none
8. Medical/Orthopaedic publications editorial/governing board (The following conflicts were disclosed)  
-none
9. Board member/committee appointments for a society (The following conflicts were disclosed)  
-none

**Each author must sign AND print or type his/her name, date and submit a separate form**

In addition, one BLINDED Conflict of Interest form (no author names used) should be submitted per manuscript with all author disclosures.

Rapeepat Narkbunnam

Author Name (Print or Type)

Author Signature

Date

# CONFLICT OF INTEREST STATEMENT

## *American Association of Hip and Knee Surgeons*

(Adopted from the American Academy of Orthopaedic Surgeons disclosure statement)

The following form **must be filled out completely and submitted by each author (example, 6 authors, 6 forms).**  
**All items require a response. If there is no relevant disclosure for a given item, enter "None."**

---

Manuscript Title Delayed femoral artery occlusion after total hip arthroplasty through the posterior approach: A case report

1. Royalties from a company or supplier (The following conflicts were disclosed)  
- none
2. Speakers bureau/paid presentations for a company or supplier (The following conflicts were disclosed)  
-none
- 3A. Paid employee for a company or supplier (The following conflicts were disclosed)  
-none
- 3B. Paid consultant for a company or supplier (The following conflicts were disclosed)  
-none
- 3C. Unpaid consultants for a company or supplier (The following conflicts were disclosed)  
-none
4. Stock or stock options in a company or supplier (The following conflicts were disclosed)  
-none
5. Research support from a company or supplier as a Principal Investigator (The following conflicts were disclosed)  
-none
6. Other financial or material support from a company or supplier (The following conflicts were disclosed)  
-none
7. Royalties, financial or material support from publishers (The following conflicts were disclosed)  
-none
8. Medical/Orthopaedic publications editorial/governing board (The following conflicts were disclosed)  
-none
9. Board member/committee appointments for a society (The following conflicts were disclosed)  
-none

**Each author must sign AND print or type his/her name, date and submit a separate form**

In addition, one BLINDED Conflict of Interest form (no author names used) should be submitted per manuscript with all author disclosures.

Chaturong Pomrattanamaneewong



---

Author Name (Print or Type)

Author Signature

Date

# CONFLICT OF INTEREST STATEMENT

## *American Association of Hip and Knee Surgeons*

(Adopted from the American Academy of Orthopaedic Surgeons disclosure statement)

The following form **must be filled out completely and submitted by each author (example, 6 authors, 6 forms).**  
**All items require a response. If there is no relevant disclosure for a given item, enter "None."**

---

Manuscript Title Delayed femoral artery occlusion after total hip arthroplasty through the posterior approach: A case report

1. Royalties from a company or supplier (The following conflicts were disclosed)  
- none
2. Speakers bureau/paid presentations for a company or supplier (The following conflicts were disclosed)  
-none
- 3A. Paid employee for a company or supplier (The following conflicts were disclosed)  
-none
- 3B. Paid consultant for a company or supplier (The following conflicts were disclosed)  
-none
- 3C. Unpaid consultants for a company or supplier (The following conflicts were disclosed)  
-none
4. Stock or stock options in a company or supplier (The following conflicts were disclosed)  
-none
5. Research support from a company or supplier as a Principal Investigator (The following conflicts were disclosed)  
-none
6. Other financial or material support from a company or supplier (The following conflicts were disclosed)  
-none
7. Royalties, financial or material support from publishers (The following conflicts were disclosed)  
-none
8. Medical/Orthopaedic publications editorial/governing board (The following conflicts were disclosed)  
-none
9. Board member/committee appointments for a society (The following conflicts were disclosed)  
-none

**Each author must sign AND print or type his/her name, date and submit a separate form**

In addition, one BLINDED Conflict of Interest form (no author names used) should be submitted per manuscript with all author disclosures.

Keerati Chareancholvanich



---

Author Name (Print or Type)

Author Signature

Date
